# Supplementary material for: Geographic Spatial Distribution Patterns of Dirofilaria immitis and Brugia pahangi Infection in Community Dogs in Chiang Mai, Thailand
Source: PubMed Central journal article supplement (PMC7824140; doi:10.3390/ani11010033), 2020-12-26
Supplement: animals-11-00033-s001.pdf [file animals-11-00033-s001.pdf]

**Table S1.** The 5.8S-ITS2 sequence list of *D. immitis*, *B. pahangi*, and other filarial nematodes used for phylogenetic analysis.

| Filaria Species and Isolates          | Accession No. | References |
|---------------------------------------|---------------|------------|
| <i>D. immitis</i>                     |               |            |
| Di_CM329                              | LC554219      | This study |
| Di_CM331                              | LC554220      |            |
| Di_Brazil_dog                         | KX932115      | [1]        |
| Di_Brazil_dog                         | KX932106      |            |
| Di_Bulgaria_dog                       | MN596213      | [2]        |
| Di_Lithuania_dog                      | MH663471      | [3]        |
| Di_Portugal_dog                       | KY644137      | [4]        |
| Di_Portugal_mosquito                  | LN626264      | [5]        |
| Di_Iran_dog                           | MF962487      | [6]        |
| Di_Iran_mosquito                      | JX889636      | [7]        |
| Di_India_dog                          | JX866681      | [8]        |
| Di_China_Red panda ( <i>Ailurus</i> ) | EU182331      | [9]        |
| Di_China_dog                          | EU182329      |            |
| Di_Tunisia_dog                        | KR676386      | [10]       |
| Di_Taiwan_dog                         | AF217800      | [11]       |
| Di_Turkey_dog                         | KF273906      | [12]       |
| Di_Turkey_Ae.vexans mosquito          | HM126606      |            |
| <i>Brugia</i>                         |               |            |
| Bp_CM22                               | LC554214      | This study |
| Bp_CM188                              | LC554215      |            |
| Bp_CM189                              | LC554216      |            |
| Bp_CM328                              | LC554217      |            |
| Bp_CM337                              | LC554218      |            |
| Bp_US_dog                             | AY988600      | [13]       |
| Bp_Thailand_Bangkok_cat7              | EU373655      | [14]       |
| Bp_Thailand_Bangkok_cat6              | EU373632      |            |
| Bm_Thailand_Narathiwat_cat5           | EU373624      |            |
| Bm_US_dog                             | AY988599      | [13]       |
| Other Filarial nematodes              |               |            |
| <i>Onchocerca volvulus</i>            | EU272179      | [15]       |
| <i>Dipetalonema reconditum</i>        | AF217801      | [11]       |
| <i>Setaria digitata</i>               | EF196091      | [16]       |
| <i>Dirofilaria repens</i>             | MK942385      | [17]       |

**Table S2.** Prevalence of canine filariasis in different districts in Chiang Mai, Thailand.

| Collecting sites | Districts   | n  | <i>B. pahangi</i> | <i>D. immitis</i> |
|------------------|-------------|----|-------------------|-------------------|
|                  |             |    | No. (%)           | No. (%)           |
| Northern zone    | Mae Rim     | 17 | 2 (11.76)         | 0                 |
|                  | Mae Tang    | 18 | 2 (11.11)         | 0                 |
|                  | Phrao       | 17 | 0                 | 0                 |
|                  | Chai Prakan | 17 | 0                 | 1 (5.88)          |
|                  | Chiang Dao  | 16 | 0                 | 3 (18.75)         |
|                  | Fang        | 19 | 0                 | 6 (31.58)         |
| Central zone     | Mae On      | 8  | 1 (12.50)         | 0                 |

|               |               |     |           |            |
|---------------|---------------|-----|-----------|------------|
|               | San Kamphaeng | 14  | 1 (7.14)  | 1 (7.14)   |
|               | Doi Saket     | 12  | 0         | 1 (8.33)   |
|               | Saraphi       | 15  | 1 (6.67)  | 4 (26.67)  |
|               | San Sai       | 14  | 0         | 2 (14.29)  |
|               | Samoeng       | 11  | 1 (9.09)  | 3 (27.27)  |
|               | Mae Wang      | 13  | 1 (7.69)  | 1 (7.69)   |
|               | San Pa Tong   | 19  | 1 (5.26)  | 0          |
|               | Mueang*       | 21  | 6 (28.57) | 6 (28.57)  |
|               | Hang Dong*    | 8   | 2 (25)    | 1 (12.5)   |
|               | Doi Lo        | 26  | 3 (11.54) | 3 (11.54)  |
| Southern zone | Chom Thong    | 22  | 2 (9.09)  | 4 (18.18)  |
|               | Hot           | 24  | 0         | 1 (4.17)   |
|               | Doi Tao       | 26  | 5 (19.23) | 4 (15.38)  |
| Total         |               | 337 | 28 (8.31) | 41 (12.17) |

\* one sample was positive PCR of both species
